# Supplementary material for: Ferroelectric $$\pi $$ π -stacks of molecules with the energy gaps in the sunlight range
Source: Springer Nature journal article supplement (doi:10.1007/s10853-016-0685-y), 2017-01-11
Supplement: MOESM1 [file 11996542]

## **Ferroelectric $\pi$ -stacks of molecules with the energy gaps in the sunlight range**

**Paweł Masiak · Małgorzata Wierzbowska**

Received: date / Accepted: date

---

Paweł Masiak  
Instytut of Physics, Polish Academy of Sciences, Aleja Lotników 32/46, PL-02668 Warsaw, Poland  
Tel.: +48-22-1163259  
Fax: +48-22-8430926  
E-mail: pmasiak@ifpan.edu.pl

Małgorzata Wierzbowska  
Instytut of Physics, Polish Academy of Sciences, Aleja Lotników 32/46, PL-02668 Warsaw, Poland

## 1 Supplementary information

Table 1: Numerical data set for Fig. 2: the LUMO-HOMO energies (in eV) of the isolated molecules with variable number of benzene rings and three dipole groups: X=COOH, Y=CH<sub>2</sub>CN, Z=CH<sub>2</sub>CF<sub>3</sub>.

|                   |                   |                   |                   |                   |                   |                    |                    |                    |                    |
|-------------------|-------------------|-------------------|-------------------|-------------------|-------------------|--------------------|--------------------|--------------------|--------------------|
| b2X <sub>4</sub>  | b2X <sub>8</sub>  | b5X <sub>4</sub>  | b5Z <sub>6</sub>  | b5X <sub>8</sub>  | b5Y <sub>10</sub> | b5X <sub>10</sub>  | b5X <sub>14</sub>  | b9X <sub>4</sub>   | b9X <sub>8</sub>   |
| 4.384             | 4.099             | 1.783             | 1.745             | 1.770             | 1.766             | 1.748              | 1.677              | 0.820              | 0.814              |
| b9Z <sub>10</sub> | b9Y <sub>14</sub> | b9X <sub>14</sub> | b9X <sub>22</sub> | b17X <sub>4</sub> | b17X <sub>8</sub> | b17Z <sub>18</sub> | b17X <sub>22</sub> | b17Y <sub>22</sub> | b17X <sub>38</sub> |
| 0.808             | 0.821             | 0.810             | 0.778             | 0.568             | 0.568             | 0.547              | 0.556              | 0.544              | 0.549              |

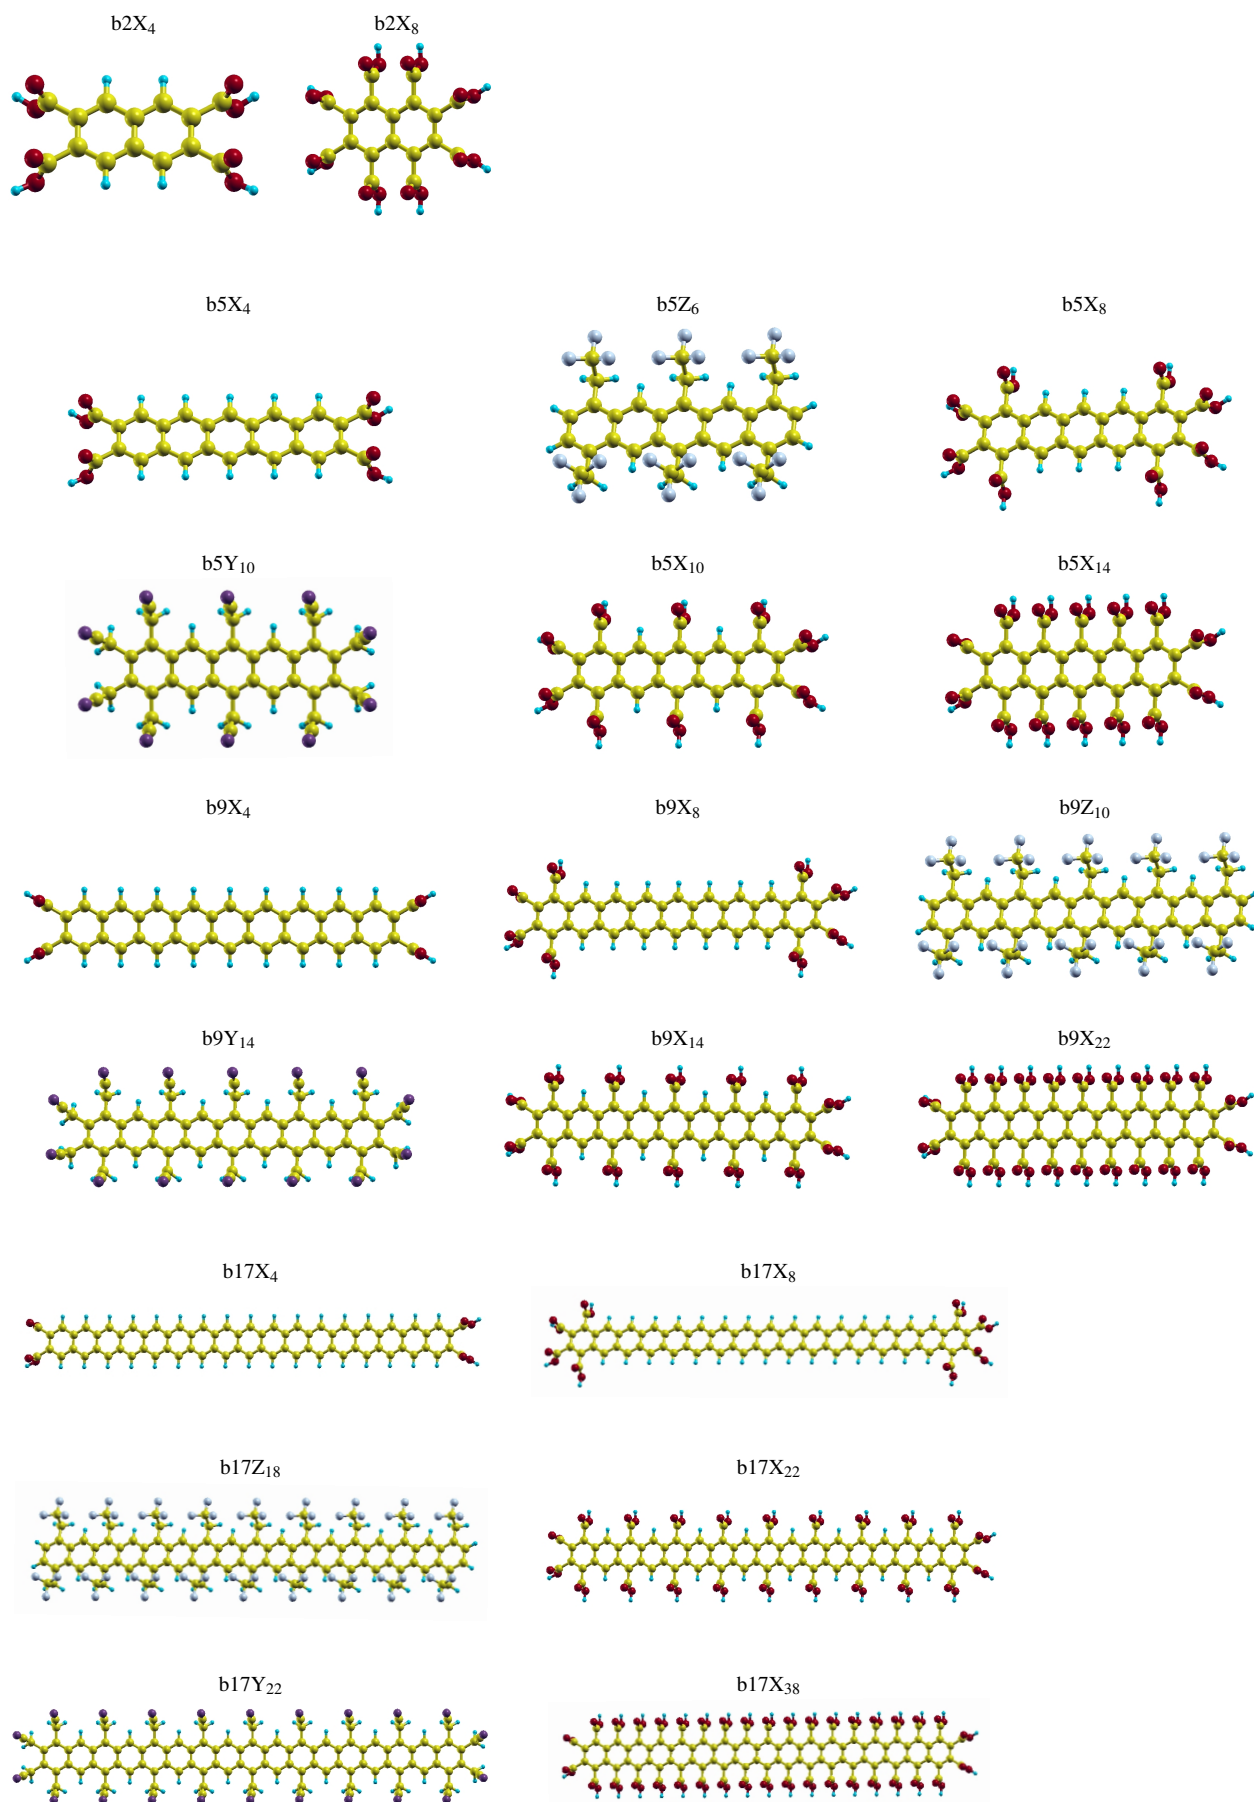

Fig. 1: Atomic structures of molecules for which the LUMO-HOMO gaps are presented in Figure 2.

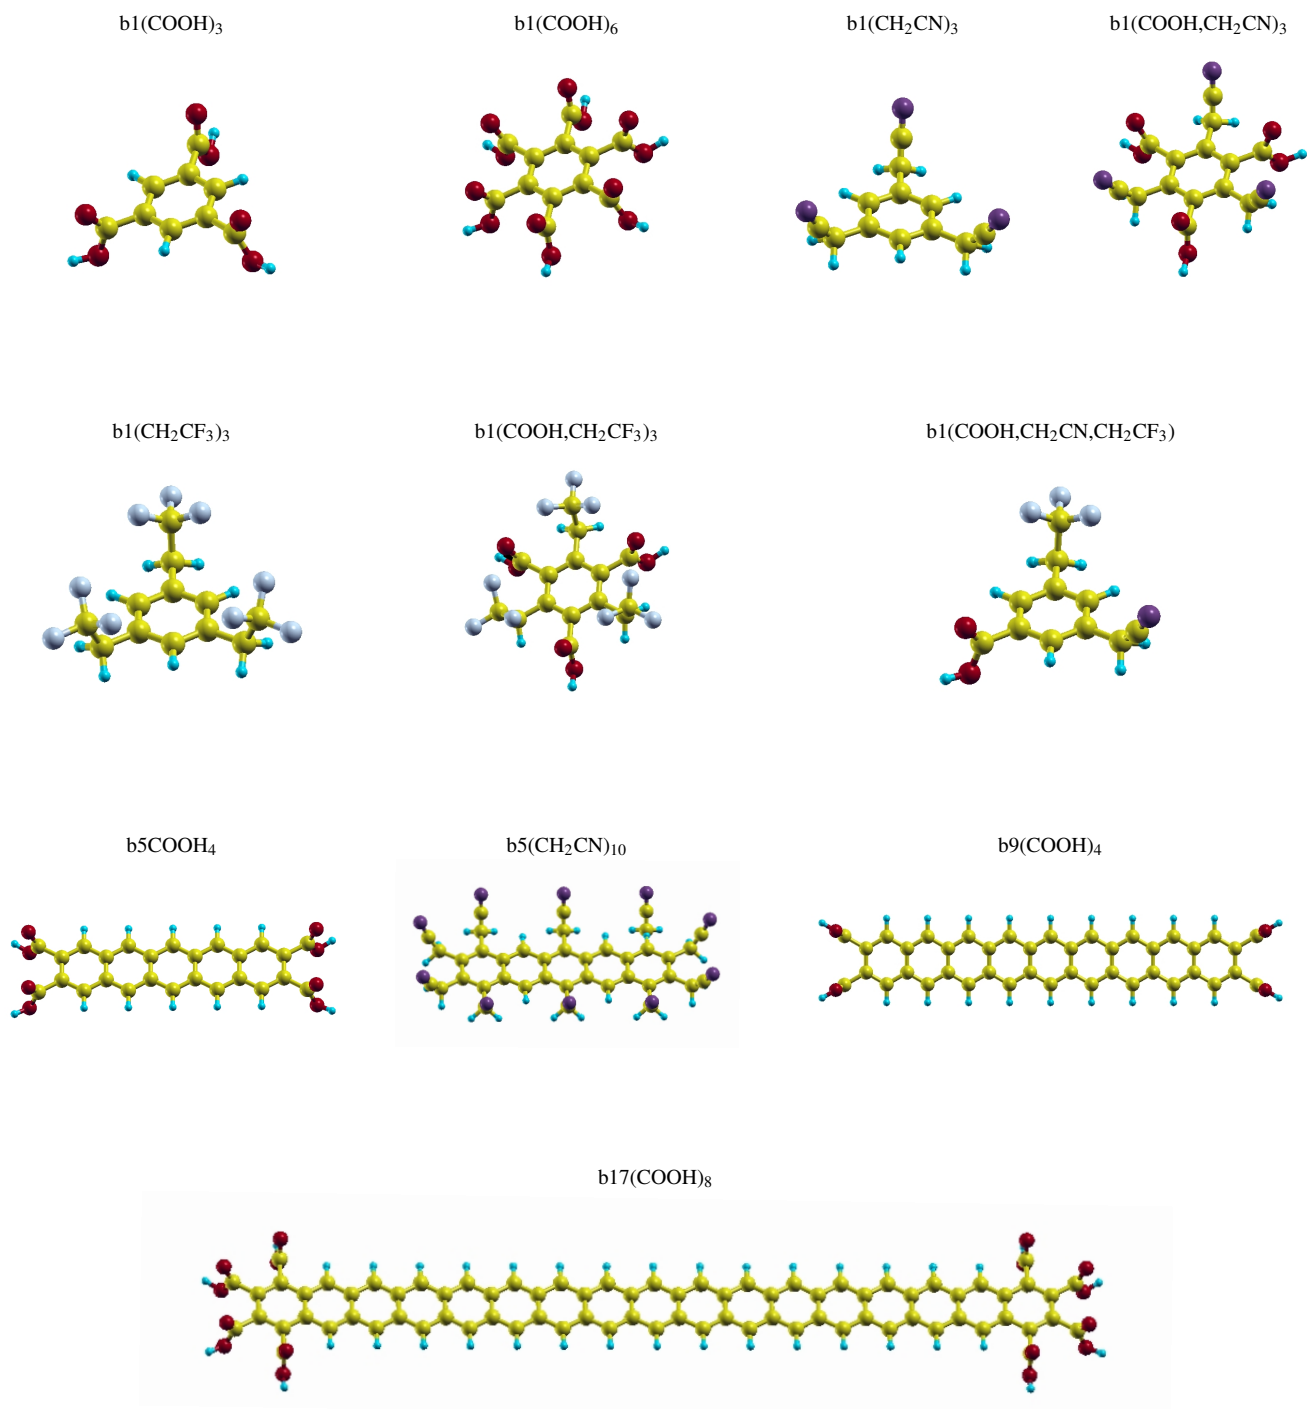

Fig. 2: Atomic structures of molecules mentioned in Table 2 of the paper.
